# Supplementary material for: Infection of Porphyromonas gingivalis Increases Phosphate-Induced Calcification of Vascular Smooth Muscle Cells
Source: PubMed Central journal article supplement (PMC7765351; doi:10.3390/cells9122694), 2020-12-15
Supplement: cells-09-02694-s001.pdf [file cells-09-02694-s001.pdf]

# Infection of *Porphyromonas gingivalis* increases phosphate-induced calcification of vascular smooth muscle cells

Hyun-Joo Park<sup>1,4,5</sup>, Yeon Kim<sup>1,4,5</sup>, Mi-Kyoung Kim<sup>1,4</sup>, Hae Ryoung Park<sup>2,4</sup>, Hyung Joon Kim<sup>1,4</sup>, Soo-Kyung Bae<sup>3,4</sup>, and Moon-Kyoung Bae<sup>1,4,5\*</sup>

<sup>1</sup> Department of Oral Physiology, BK21 PLUS Project, School of Dentistry, Pusan National University, Yangsan 50610, South Korea; phj3421@hanmail.net (H.-J.P.); graceyeon88@gmail.com (Y.K.); eenga@naver.com (M.-K.K.); hjoonkim@pusan.ac.kr (H.J.K)

<sup>2</sup> Department of Oral Pathology, School of Dentistry, Pusan National University, Yangsan 50610, South Korea; parkhr@pusan.ac.kr (H.R.P.)

<sup>3</sup> Department of Dental Pharmacology, BK21 PLUS Project, School of Dentistry, Pusan National University, Yangsan 50610, South Korea; [skbae@pusan.ac.kr](mailto:skbae@pusan.ac.kr) (S.-K.B)

<sup>4</sup> Periodontal Disease Signaling Network Research Center (MRC), School of Dentistry, Pusan National University, Dental Research Institute, Yangsan 50610, South Korea

<sup>5</sup> Dental and Life Science Institute, School of Dentistry, Pusan National University, Yangsan 50610, South Korea

\* Correspondence: [mkbae@pusan.ac.kr](mailto:mkbae@pusan.ac.kr); Tel.: +82-51-510-8239

## Supplementary Information

The following file contains supplementary material for the paper “Infection of *Porphyromonas gingivalis* increases phosphate-induced calcification of vascular smooth muscle cells”.

This file is composed of:

- Supplementary figures and relative supplementary figure legends
- Supplementary tables

# Supplementary Figures

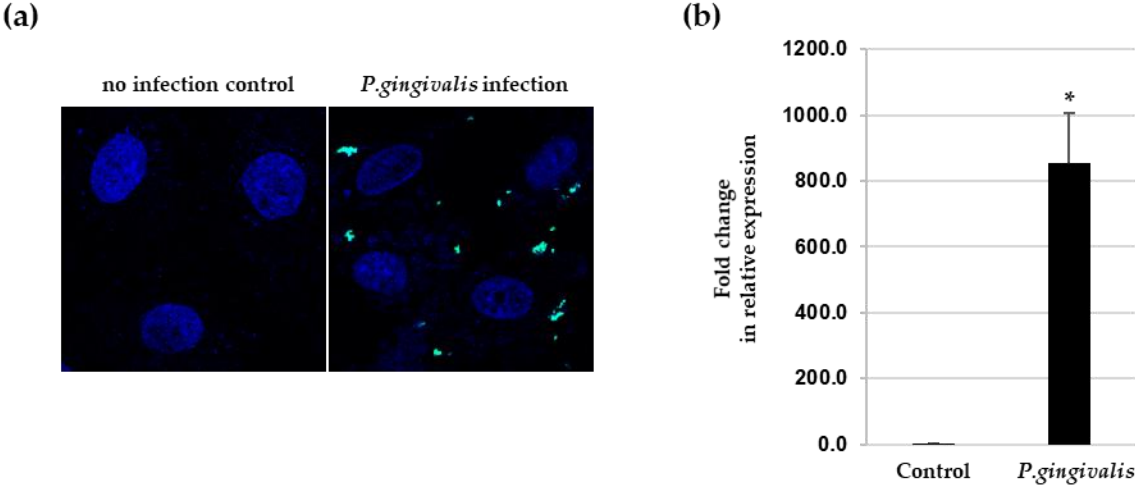

**Figure S1. Effect of *P.gingivalis* infection in A7r5 cells.** (A) A7r5 cells were infected with carboxyfluorescein succinimidyl ester (CFSE)-stained *P. gingivalis* for 3 h and then observed under a fluorescent microscope. (B) Using real-time RT-PCR, the presence of *P.gingivalis* was also confirmed. \* $P < 0.001$  vs. control. Data shown are the mean  $\pm$  SD, obtained for at least three independent experiments.

## Supplementary Tables

**Table S1. Primer sequences for real-time RT-PCR**

| Genes               | Sequences (5' → 3')                                                | Length(bp) |
|---------------------|--------------------------------------------------------------------|------------|
| <i>P.gingivalis</i> | Forward: TCGGTAAGTCAGCGGTGAAAC<br>Reverse: GCAAGCTGCCTTCGCAAT      | 150bp      |
| $\beta$ -actin      | Forward: AGGGAAATCGTGCGTGAC<br>Reverse: CGCTCATTGCCGATAGTG         | 146bp      |
| Runtx2              | Forward: GCCGGGAATGATGAGAACTA<br>Reverse: TGGGGAGGATTTGTGAAGAC     | 155bp      |
| ALP                 | Forward: TGCTTTGTGTGTGCTGACTGTA<br>Reverse: AGTGACGGTGTCTAGCCTTC T | 129bp      |
| calponin            | Forward: GAACAAGCTGGCCCAGAAAT<br>Reverse: GGCCATCCATGAAGTTGCTC     | 104bp      |
| $\alpha$ -SMA       | Forward: AAGAGTTACGAGTTGCCTGATG<br>Reverse: TGATGCTGTGTAGGTGGTTT   | 136bp      |
| Bcl2                | Forward: GCCCTGTGGATGACTGAGTA<br>Reverse: CAGGTATGCACCCAGAGTGA     | 189bp      |
| Bad                 | Forward: AGGGATGGAGGAGGAGCTTA<br>Reverse: GGAACCCTCAAACCTCATCGC    | 121bp      |
